# Supplementary material for: A 30-month field evaluation of low-cost CO 2 sensors using a reference instrument
Source: Copernicus journal article supplement (doi:10.5194/amt-18-4871-2025), 2025-09-29
Supplement: Supplementary file 1 [file amt-18-4871-2025-supplement.pdf]

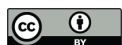

## *Supplement of*

# **A 30-month field evaluation of low-cost CO<sub>2</sub> sensors using a reference instrument**

**Qixiang Cai et al.**

*Correspondence to:* Ning Zeng (zeng@umd.edu) and Pengfei Han (pfhan@mail.iap.ac.cn)

The copyright of individual parts of the supplement might differ from the article licence.

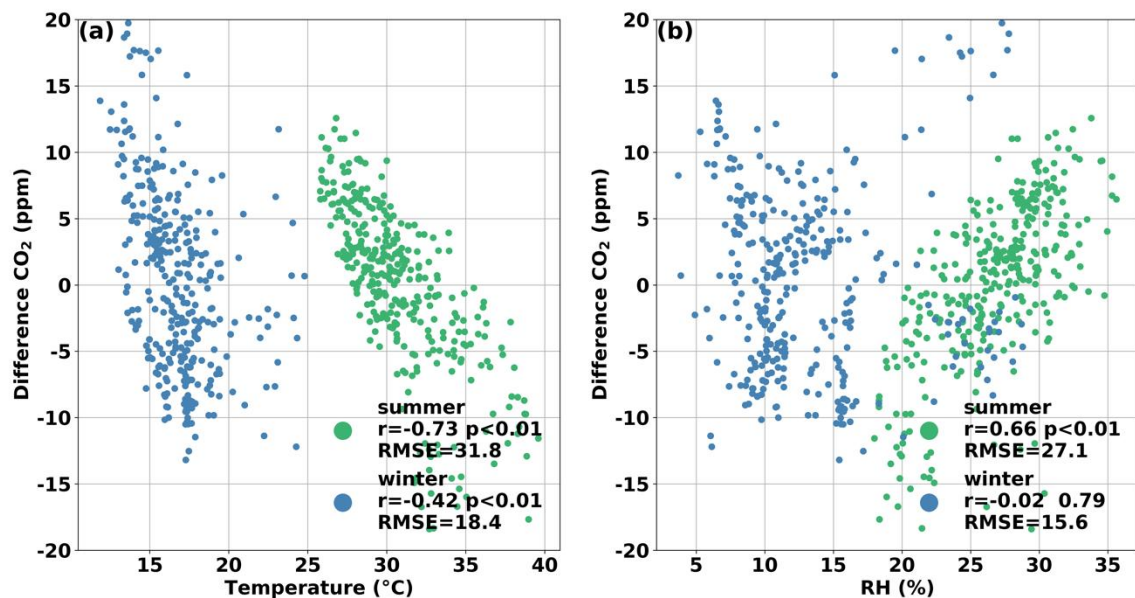

**Figure S1.** Temperature (a) and relative humidity (b) dependence of  $\Delta\text{CO}_2$ . For SENSE-IAP at Beijing site from July 13<sup>th</sup> to 27<sup>th</sup> in 2022 (summer in green) and January 10<sup>th</sup> to 24<sup>th</sup> in 2023 (winter in blue).

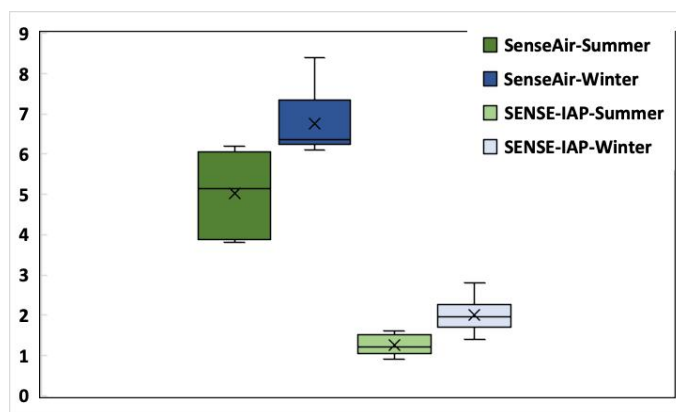

**Figure S2.** Comparison of both raw  $\text{CO}_2$  data from SenseAir (dark) and environment corrected SENSE-IAP (light) with Picarro in summer (July 13<sup>th</sup> to 27<sup>th</sup> in 2022, green) and winter (January 10<sup>th</sup> to 24<sup>th</sup> in 2023, blue). Box plot include the RMSE for all six sensors at Beijing site.

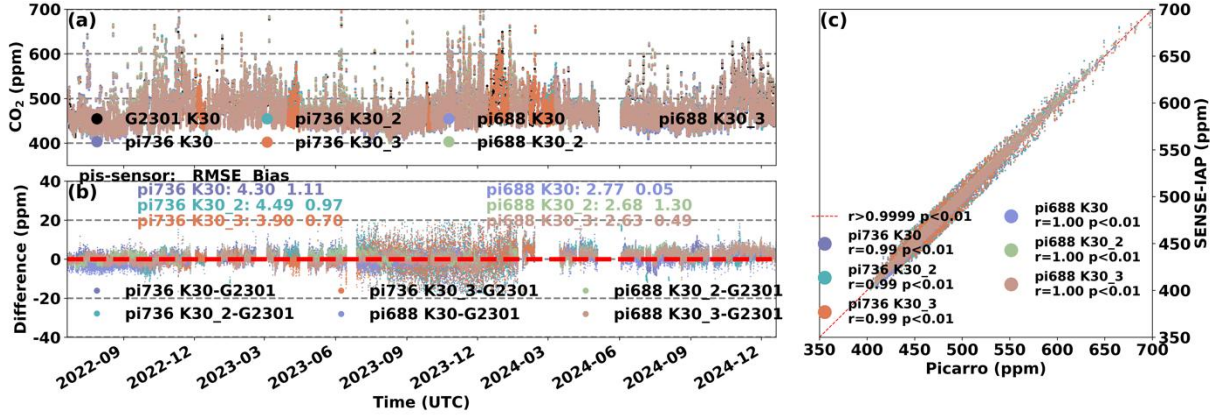

**Figure S3:** (a) Comparison of hourly CO<sub>2</sub> concentrations measured by all six sensors of SENSE-IAP (after drift correlation) in two instruments and Picarro system at Beijing-IAP from June 2022 to Dec 2024, (b) the time series of  $\Delta\text{CO}_2$ , (c) scatter plot of SENSE-IAP and Picarro.

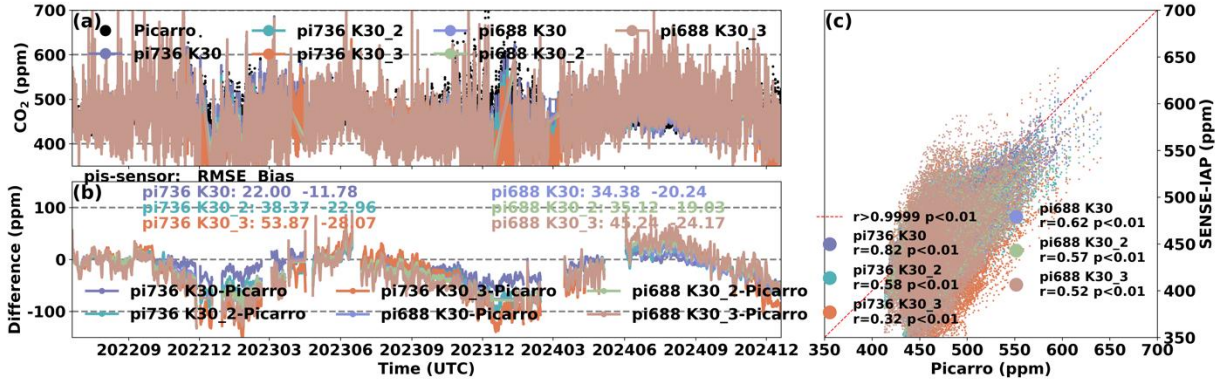

**Figure S4:** (a) Comparison of hourly CO<sub>2</sub> concentrations measured by all six sensors of raw signal in two instruments and Picarro system at Beijing-IAP from June 2022 to Dec 2024, (b) the time series of  $\Delta\text{CO}_2$  through a 24-hour running mean, (c) scatter plot of raw signal and Picarro.

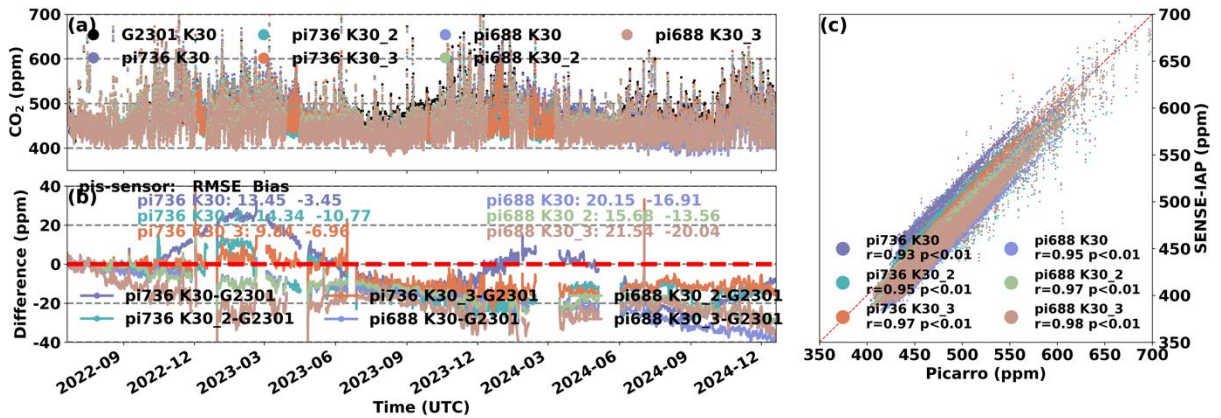

**Figure S5:** (a) Comparison of hourly CO<sub>2</sub> concentrations measured by all six sensors of SENSE\_IAP in two instruments and Picarro system at Beijing-IAP from June 2022 to Dec 2024, (b) the time series of  $\Delta\text{CO}_2$  through a 24-hour running mean, (c) scatter plot of SENSE\_IAP and Picarro.

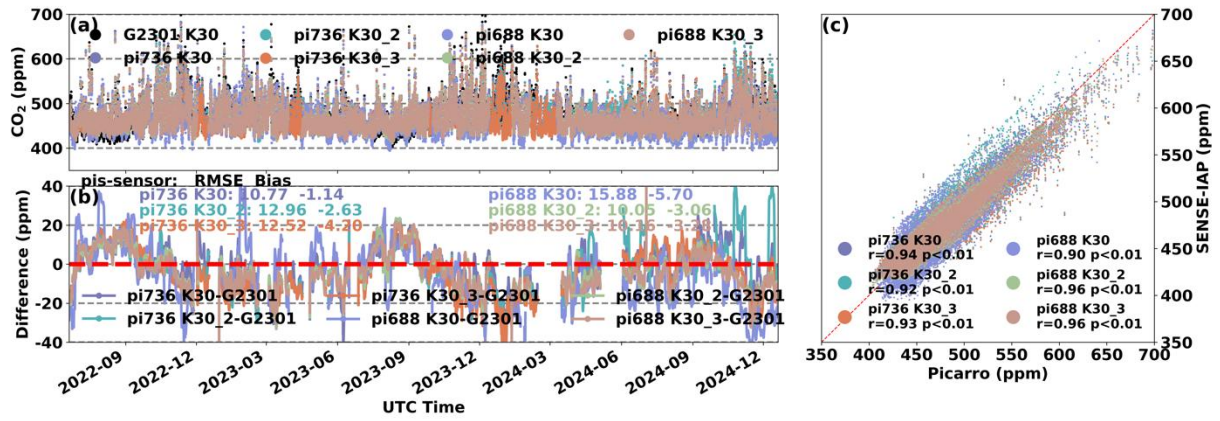

**Figure S6:** (a) Comparison of hourly CO<sub>2</sub> concentrations measured by all six sensors of SenseAir in two instruments and Picarro system at Beijing-IAP from June 2022 to Dec 2024, (b) the time series of  $\Delta\text{CO}_2$  through a 24-hour running mean, (c) scatter plot of SenseAir and Picarro.

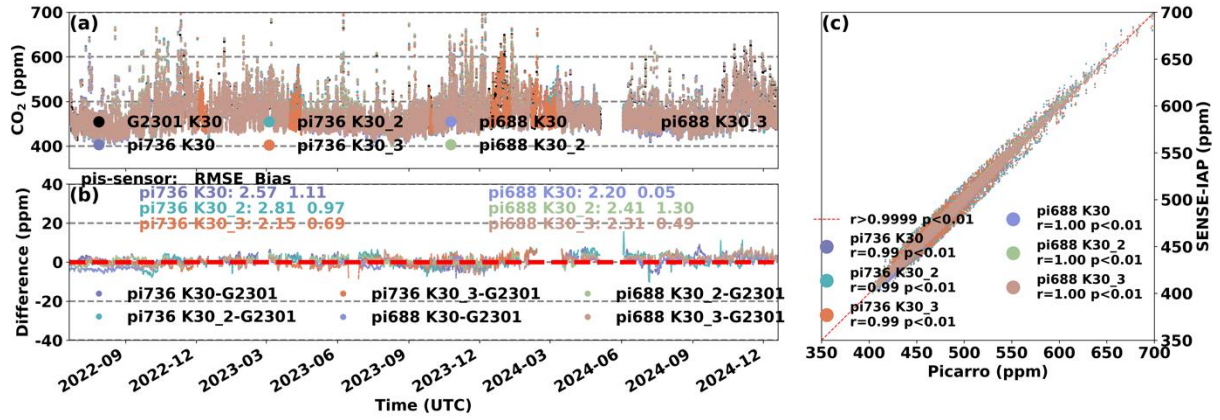

**Figure S7:** (a) Comparison of hourly CO<sub>2</sub> concentrations measured by all six sensors of SENSE-IAP (after drift correlation) in two instruments and Picarro system at Beijing-IAP from June 2022 to Dec 2024, (b) the time series of  $\Delta\text{CO}_2$  through a 24-hour running mean, (c) scatter plot of SENSE-IAP and Picarro.



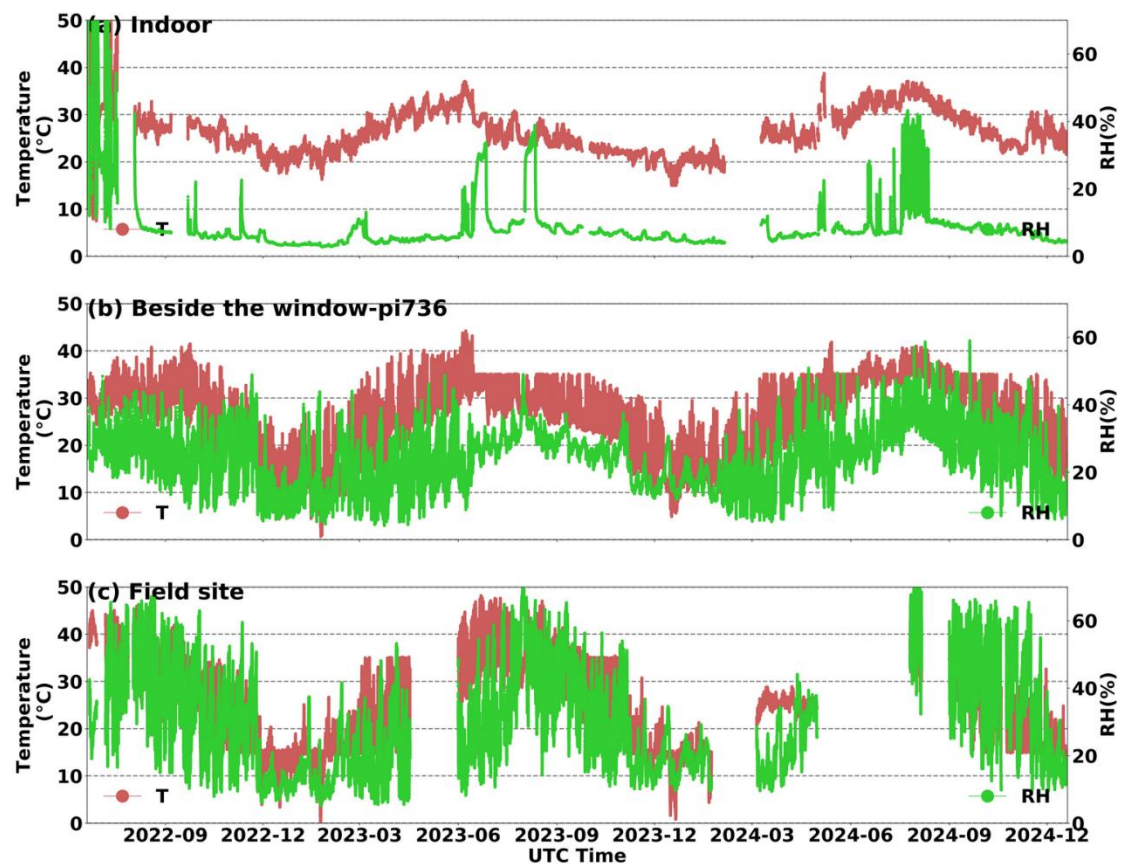

**Figure S8:** The temperature and humidity variation of LCS instruments under (a) indoor, (b) beside the window, and (c) field conditions during the experimental period.
